# Supplementary material
Source: publisher figshare collection journal article supplement (https://acs.figshare.com/ndownloader/files/4679314)
Supplement: Supplementary file 1 [file 4679314]

## Supporting Information

### “Effects of Polar Group Saturation on Physical Gelation of Amphiphilic Polymer Solutions”

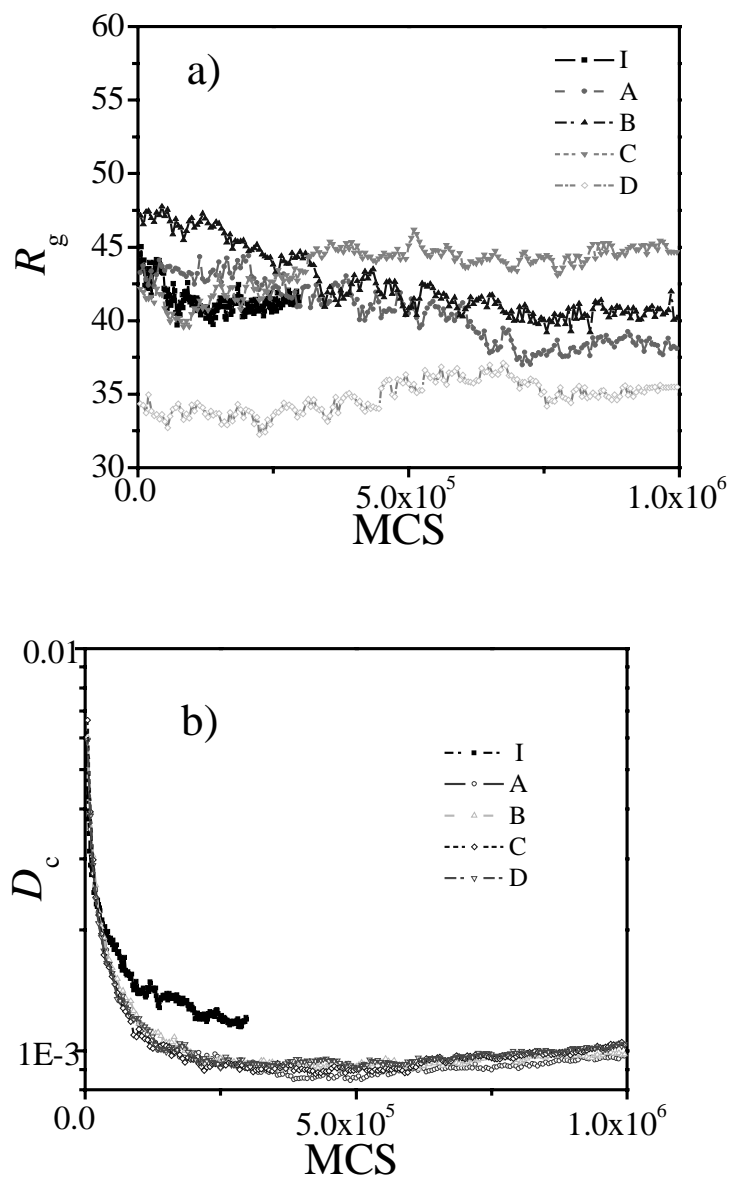

**Figure S1.** The simulation time dependence of the root-mean square radius of gyration ( $R_g$ ) a) and the diffusion coefficient  $D_c$  ( $k_{sa} = 0.36$ ,  $\phi = 0.15$ ) b). Both of the two parameters level off as the simulation time increases in the typical time profiles for all simulation data. Here the labels I, A, B, C, D represent the initial  $3 \times 10^5$  MCS Monte Carlos simulation without any interactions, and the four different solvent conditions running for a total of  $1 \times 10^6$  MCS respectively.

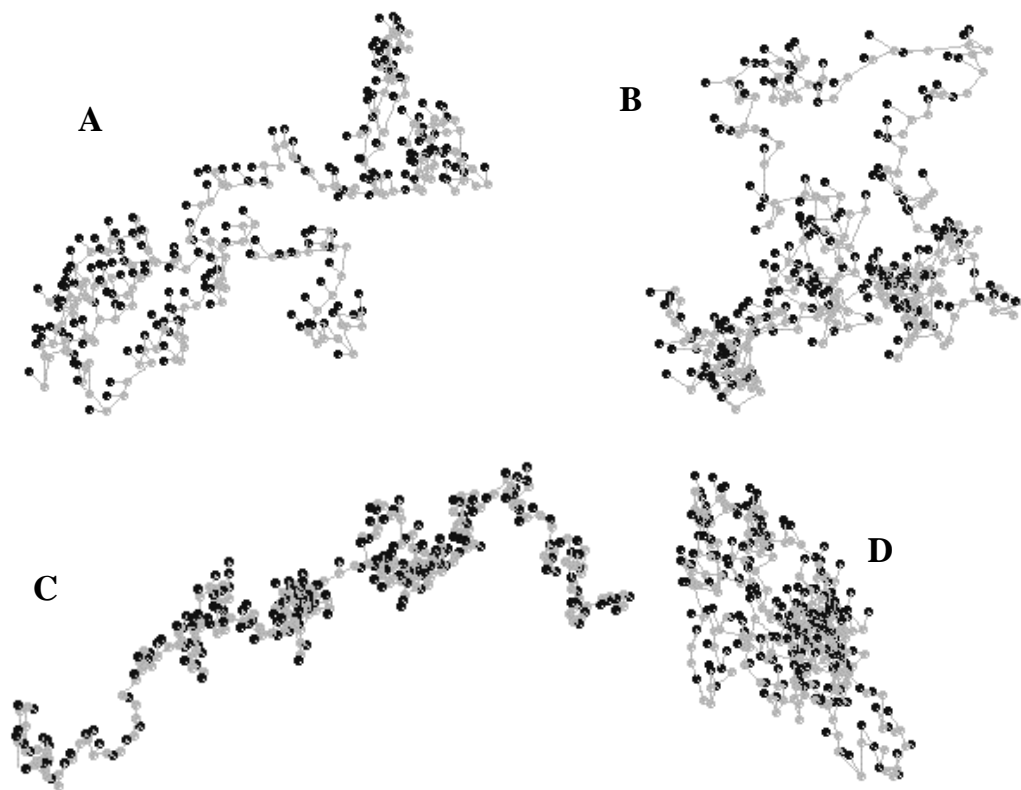

**Figure S2.** Snapshots of the single chain conformation picked up from the final simulation configurations ( $k_{sa} = 0.36$ ,  $\phi = 0.15$ ) under four different solvent conditions described in Table 1. The dark and grey dots are the side-chain P monomers and the backbone N monomers respectively.
